# Supplementary material
Source: PubMed Central journal article supplement (PMC9126132)
Supplement: ehp10669.s001.acco.pdf [file ehp10669.s001.acco.pdf]

**Note to readers with disabilities:** *EHP* strives to ensure that all journal content is accessible to all readers. However, some figures and Supplemental Material published in *EHP* articles may not conform to [508 standards](#) due to the complexity of the information being presented. If you need assistance accessing journal content, please contact [ehp508@niehs.nih.gov](mailto:ehp508@niehs.nih.gov). Our staff will work with you to assess and meet your accessibility needs within 3 working days.

### **Supplemental Material**

#### **Lung Cancer and Radon: Pooled Analysis of Uranium Miners Hired in 1960 or Later**

David B. Richardson, Estelle Rage, Paul A. Demers, Minh T. Do, Nora Fenske, Veronika Deffner, Michaela Kreuzer, Jonathan Samet, Stephen J. Bertke, Kaitlin Kelly-Reif, Mary K. Schubauer-Berigan, Ladislav Tomasek, Lydia B. Zablotska, Charles Wiggins, and Dominique Laurier

#### **Table of Contents**

**Table S1.** Estimates of excess relative rate of lung cancer mortality (95% confidence intervals) by categories of cumulative exposure to radon progeny, lagged 5 years. Background stratified by study cohort, attained age, calendar period, and duration of employment as a uranium miner. Pooled Uranium Miners Analysis (PUMA) of uranium miners in Canada, Czech Republic, France, Germany, and USA, male miners hired in 1960 or later.

**Table S2.** Impact on goodness of model fit of inclusion of parameters describing the association between cumulative exposure to radon progeny and lung cancer mortality. PUMA study of uranium miners in Canada, Czech Republic, France, Germany, and USA, male miners hired in 1960 or later.

**Table S3.** Regression estimates of the excess relative rate of lung cancer mortality per 100 WLM with effect modification by attained age, age at exposure, and exposure rate. PUMA study of uranium miners in Canada, Czech Republic, France, Germany, and USA, male miners hired in 1960 or later. Restricted to person-time and events observed among those employed at least 1 or 5 years.

**Table S4.** Regression estimates of the excess relative rate of lung cancer mortality per 100 WLM with effect modification by time since exposure. PUMA study of uranium miners in Canada, Czech Republic, France, Germany, and USA, male miners hired in 1960 or later.

Table S1. Estimates of excess relative rate of lung cancer mortality (95% confidence intervals) by categories of cumulative exposure to radon progeny, lagged 5 years. Background stratified by study cohort, attained age, calendar period, and duration of employment as a uranium miner. Pooled Uranium Miners Analysis (PUMA) of uranium miners in Canada, Czech Republic, France, Germany, and USA, male miners hired in 1960 or later.

| Exposure category (in WLM) | Estimate | (95% CI)      |
|----------------------------|----------|---------------|
| 0 (reference)              | 0.       | (--,--)       |
| >0-10                      | 0.12     | (-0.09, 0.37) |
| >10-20                     | 0.36     | (0.06, 0.74)  |
| >20-30                     | 0.57     | (0.18, 1.08)  |
| >30-40                     | 0.97     | (0.44, 1.66)  |
| >40-50                     | 0.92     | (0.32, 1.76)  |
| >50-60                     | 1.50     | (1.73, 2.55)  |
| >60-70                     | 1.18     | (0.42, 2.25)  |
| >70-80                     | 0.49     | (-0.18, 1.52) |
| >80-90                     | 1.41     | (0.41, 2.89)  |
| >90-100                    | 1.86     | (0.68, 3.63)  |
| >100-110                   | 1.49     | (0.29, 3.38)  |
| >110-120                   | 2.31     | (0.60, 5.10)  |
| >120-130                   | 1.88     | (0.40, 4.30)  |
| >130-140                   | 1.37     | (0.00, 3.77)  |
| >140-150                   | 2.24     | (0.25, 5.86)  |
| >150                       | 2.35     | (1.27, 3.85)  |

Table S2. Impact on goodness of model fit of inclusion of parameters describing the association between cumulative exposure to radon progeny and lung cancer mortality. PUMA study of uranium miners in Canada, Czech Republic, France, Germany, and USA, male miners hired in 1960 or later.

| Model |                                                                 | 2LogL                                                    | d.f.             |
|-------|-----------------------------------------------------------------|----------------------------------------------------------|------------------|
| 0     | Null                                                            | $RR = 1$                                                 | -10651.368 69918 |
| 1     | Linear                                                          | $RR = 1 + \beta D$                                       | -10721.265 69917 |
| 2     | Linear-Quadratic                                                | $RR = 1 + \beta D + \gamma D^2$                          | -10722.396 69916 |
| 3     | Study cohort-specific                                           | $RR = 1 + \sum_{c=1}^7 \beta_c D$                        | -10727.768 69911 |
| 4     | Attained age <sup>a</sup>                                       | $RR = 1 + \beta D \exp(\sum_{j=1}^4 \varphi_j x_j)$      | -10733.824 69914 |
| 5     | Attained age, age at exposure <sup>a,b</sup>                    | $RR = 1 + \beta D^* \exp(\sum_{j=1}^4 \varphi_j x_j)$    | -10736.473 69913 |
| 6     | Attained age, age at exposure, exposure rate <sup>a,c</sup>     | $RR = 1 + \beta D^* \exp(\sum_{j=1}^4 \varphi_j x_j)$    | -10747.675 69911 |
| 7     | Time since exposure <sup>d</sup>                                | $RR = 1 + \beta D^{**}$                                  | -10724.916 69915 |
| 8     | Attained age, time since exposure <sup>a,d</sup>                | $RR = 1 + \beta D^{**} \exp(\sum_{j=1}^4 \varphi_j x_j)$ | -10734.648 69912 |
| 9     | Attained age, time since exposure, exposure rate <sup>a,e</sup> | $RR = 1 + \beta D^{**} \exp(\sum_{j=1}^4 \varphi_j x_j)$ | -10746.562 69910 |

2LogL: twice the log likelihood; RR: Relative Rate; d.f.: degrees of freedom

<sup>a</sup>  $\varphi_1 = 0$  for attained age <55 years.

<sup>b</sup> where  $D^* = w_{\geq 35} + \theta_1 w_{< 35}$ , letting  $w_{ae}$  index cumulative exposure in windows defined by age-at-exposure.

<sup>c</sup> where  $D^* = w_{\geq 35, < 0.5} + \theta_2 w_{\geq 35, 0.5 - < 1} + \theta_3 w_{\geq 35, \geq 1} + \theta_1 w_{< 35, < 0.5} + \theta_1 \theta_2 w_{< 35, 0.5 - < 1} + \theta_1 \theta_3 w_{< 35, \geq 1}$ , letting  $w_{ae,er}$  index cumulative exposure in windows defined by age-at-exposure and exposure rate.

<sup>d</sup> where  $D^{**} = v_{5-14} + \vartheta_1 v_{15-24} + \vartheta_2 v_{\geq 25}$ , letting  $w_{tse}$  index cumulative exposure in windows defined by time since exposure.

<sup>e</sup> where  $D^{**} = v_{5-14, < 0.5} + \vartheta_3 v_{5-14, 0.5 - < 1} + \vartheta_4 v_{5-14, \geq 1} + \vartheta_1 v_{15-24, < 0.5} + \vartheta_3 \vartheta_1 v_{15-24, 0.5 - < 1} + \vartheta_4 \vartheta_1 v_{15-24, \geq 1} + \vartheta_2 v_{\geq 25, < 0.5} + \vartheta_3 \vartheta_2 v_{\geq 25, 0.5 - < 1} + \vartheta_4 \vartheta_2 v_{\geq 25, \geq 1}$ , letting  $w_{tse,er}$  index cumulative exposure in windows defined by time since exposure and exposure rate.

Table S3. Regression estimates of the excess relative rate of lung cancer mortality per 100 WLM with effect modification by attained age, age at exposure, and exposure rate. PUMA study of uranium miners in Canada, Czech Republic, France, Germany, and USA, male miners hired in 1960 or later. Restricted to person-time and events observed among those employed at least 1 or 5 years.

| Person-time and events restricted to: | Employed $\geq 1$ year <sup>a,c</sup> |               | Employed $\geq 5$ years <sup>a,d</sup> |               | Employed $\geq 5$ years <sup>b,d</sup> |               |
|---------------------------------------|---------------------------------------|---------------|----------------------------------------|---------------|----------------------------------------|---------------|
|                                       | Estimate                              | (95% CI)      | Estimate                               | (95% CI)      | Estimate                               | (95% CI)      |
| ERR/100 WLM<br>(95% CI)               | 8.49                                  | (3.21, 19.94) | 6.87                                   | (2.43, 16.90) | 5.56                                   | (1.95, 13.28) |
| Age at exposure                       |                                       |               |                                        |               |                                        |               |
| 35+ years                             | 1.                                    |               | 1.                                     |               | 1.                                     |               |
| <35 years                             | 0.60                                  | (0.30, 1.25)  | 0.65                                   | (0.31, 1.47)  | 0.68                                   | (0.31, 1.62)  |
| Attained age                          |                                       |               |                                        |               |                                        |               |
| <55 years                             | 1.                                    |               | 1.                                     |               | 1.                                     |               |
| 55-64 years                           | 0.52                                  | (0.22, 1.28)  | 0.59                                   | (0.21, 1.64)  | 0.57                                   | (0.21, 1.54)  |
| 65-74 years                           | 0.19                                  | (0.05, 0.52)  | 0.20                                   | (0.05, 0.63)  | 0.20                                   | (0.05, 0.63)  |
| 75+ years                             | 0.14                                  | (0.02, 0.64)  | 0.20                                   | (0.03, 1.01)  | 0.30                                   | (0.00, 1.40)  |
| Exposure rate                         |                                       |               |                                        |               |                                        |               |
| <0.5 WL                               | 1.                                    |               | 1.                                     |               | 1.                                     |               |
| 0.5-<1 WL                             | 1.29                                  | (0.51, 2.95)  | 1.61                                   | (0.62, 3.93)  | 1.76                                   | (0.67, 4.50)  |
| 1+ WL                                 | 0.37                                  | (0.14, 0.85)  | 0.33                                   | (0.07, 0.92)  | 0.36                                   | (0.07, 1.00)  |
| Lung cancers                          | 1124                                  |               | 688                                    |               | 688                                    |               |
| Person-years ( $10^5$ )               | 17.18                                 |               | 9.07                                   |               | 9.07                                   |               |

<sup>a</sup> Background stratified by attained age, calendar period, study cohort, and duration of employment as a uranium miner.

<sup>b</sup> Background stratified by attained age, calendar period, study cohort.

<sup>c</sup> restricted to person-time and events for which duration of employment  $\geq 1$  year

<sup>d</sup> restricted to person-time and events for which duration of employment  $\geq 5$  years

Table S4. Regression estimates of the excess relative rate of lung cancer mortality per 100 WLM with effect modification by time since exposure. PUMA study of uranium miners in Canada, Czech Republic, France, Germany, and USA, male miners hired in 1960 or later.

|                     | Estimate | (95% CI)     |
|---------------------|----------|--------------|
| ERR/100 WLM         | 2.86     | (0.47, 6.71) |
| Time since exposure |          |              |
| 5-14 years prior    | 1.       | --           |
| 15-24 years prior   | 0.72     | (0.19, 5.05) |
| 25+ years prior     | 0.39     | (0.14, 2.45) |
