# Supplementary material
Source: PubMed Central journal article supplement (PMC9126132)
Supplement: ehp10669.smcontents.508.pdf [file ehp10669.smcontents.508.pdf]

**Note to readers with disabilities:** *EHP* strives to ensure that all journal content is accessible to all readers. However, some figures and Supplemental Material published in *EHP* articles may not conform to [508 standards](#) due to the complexity of the information being presented. If you need assistance accessing journal content, please contact [ehp508@niehs.nih.gov](mailto:ehp508@niehs.nih.gov). Our staff will work with you to assess and meet your accessibility needs within 3 working days.

### **Supplemental Material**

#### **Lung Cancer and Radon: Pooled Analysis of Uranium Miners Hired in 1960 or Later**

David B. Richardson, Estelle Rage, Paul A. Demers, Minh T. Do, Nora Fenske, Veronika Deffner, Michaela Kreuzer, Jonathan Samet, Stephen J. Bertke, Kaitlin Kelly-Reif, Mary K. Schubauer-Berigan, Ladislav Tomasek, Lydia B. Zablotska, Charles Wiggins, and Dominique Laurier

#### **Table of Contents**

**Table S1.** Estimates of excess relative rate of lung cancer mortality (95% confidence intervals) by categories of cumulative exposure to radon progeny, lagged 5 years. Background stratified by study cohort, attained age, calendar period, and duration of employment as a uranium miner. Pooled Uranium Miners Analysis (PUMA) of uranium miners in Canada, Czech Republic, France, Germany, and USA, male miners hired in 1960 or later.

**Table S2.** Impact on goodness of model fit of inclusion of parameters describing the association between cumulative exposure to radon progeny and lung cancer mortality. PUMA study of uranium miners in Canada, Czech Republic, France, Germany, and USA, male miners hired in 1960 or later.

**Table S3.** Regression estimates of the excess relative rate of lung cancer mortality per 100 WLM with effect modification by attained age, age at exposure, and exposure rate. PUMA study of uranium miners in Canada, Czech Republic, France, Germany, and USA, male miners hired in 1960 or later. Restricted to person-time and events observed among those employed at least 1 or 5 years.

**Table S4.** Regression estimates of the excess relative rate of lung cancer mortality per 100 WLM with effect modification by time since exposure. PUMA study of uranium miners in Canada, Czech Republic, France, Germany, and USA, male miners hired in 1960 or later.
